# Supplementary material
Source: PubMed Central journal article supplement (PMC3083219)
Supplement: supp_M110.207944_jbc.M110.207944-1.pdf [file supp_M110.207944_jbc.M110.207944-1.pdf]

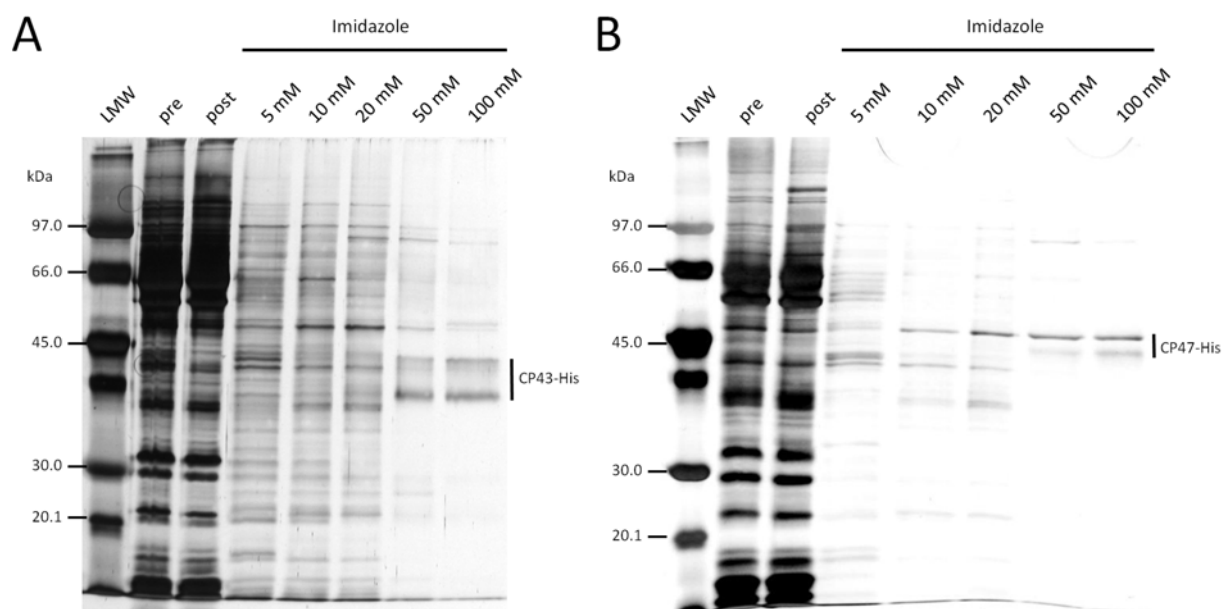

**Supplementary Figure 1: SDS PAGE analysis of the Ni<sup>2+</sup>-affinity purification of CP43-His and CP47-His.** The fractions collected during the Ni<sup>2+</sup>-affinity purification of (A) CP43-His and (B) CP47-His were analysed by SDS PAGE. Pre and Post incubation samples (corresponding to an amount of 1  $\mu$ g of Chl *a*) as well as equal amounts of samples taken from the various washes (5, 10 and 20 mM imidazole) and elutions (50 and 100 mM imidazole) were analysed on a 12.5 % (w/v) polyacrylamide SDS-PAGE gel that was subsequently silver-stained. The positions of CP43-His and CP47-His proteins are indicated.

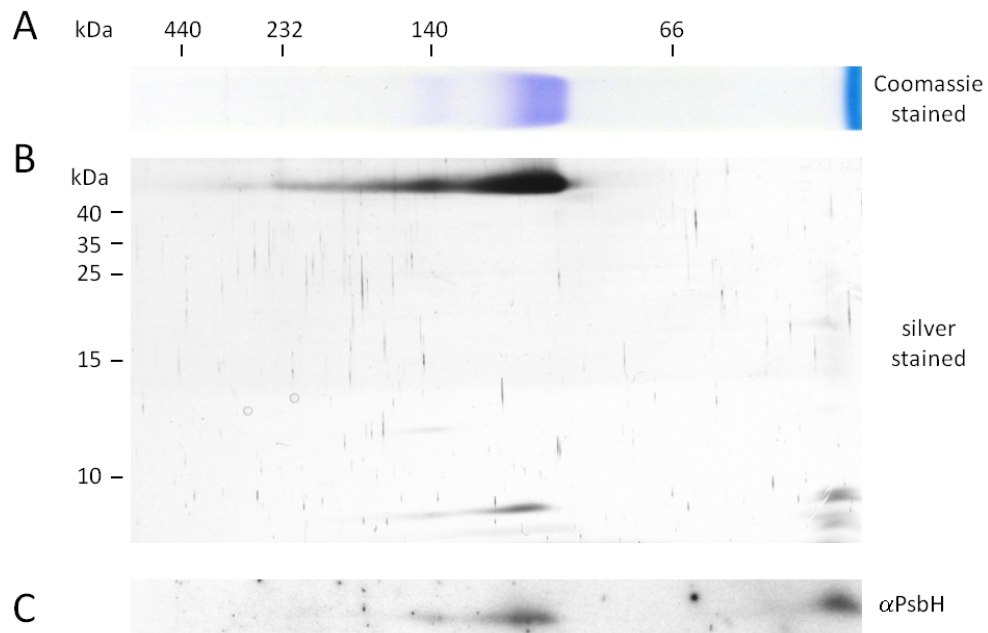

**Supplementary Figure 2: 2D BN/SDS-PAGE and immunoblotting analysis of CP47-His.** (A) Isolated CP47-His protein containing 0.5  $\mu\text{g}$  Chl *a* was analysed on a 8 to 12 % (w/v) polyacrylamide BN-PAGE linear gradient gel (B) followed by a 18 % (w/v) polyacrylamide SDS-PAGE gel and (C) immunoblotting with an  $\alpha\text{PsbH}$  antibody. The first dimension BN-PAGE gel was Coomassie stained, while the second dimension SDS-PAGE gel was stained with silver.

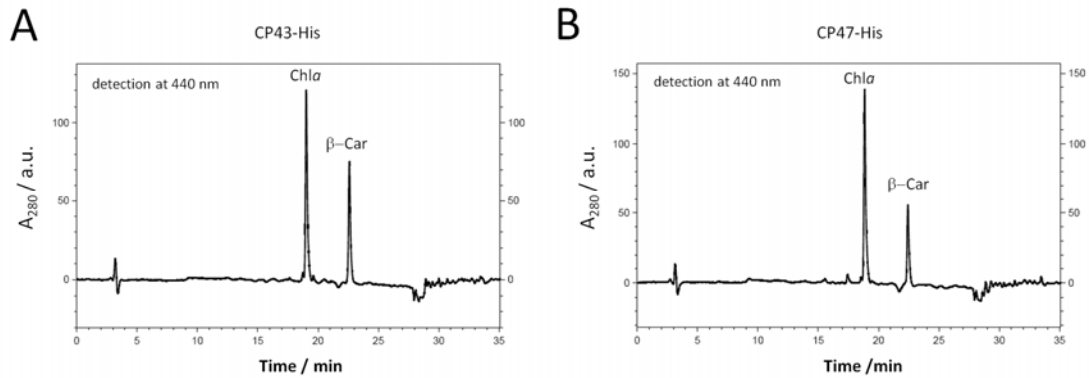

**Supplementary Figure 3: Reverse-phase HPLC pigment analysis.** Traces of the HPLC pigment analysis runs recorded at 440 nm for samples of CP43-His (panel A) and CP47-His (panel B). Positions of the Chl *a* and  $\beta$ -Car peaks indicated.
